# Supplementary material for: Application of a Time-Stratified Case-Crossover Design to Explore the Effects of Air Pollution and Season on Childhood Asthma Hospitalization in Cities of Differing Urban Patterns: Big Data Analytics of Government Open Data
Source: PubMed Central journal article supplement (PMC5923689; doi:10.3390/ijerph15040647), 2018-03-31
Supplement: ijerph-15-00647-s001.pdf [file ijerph-15-00647-s001.pdf]

**Table S1 Pearson correlation matrix of air pollutants and temperature in Taipei and Kaohsiung**

| <b>Taipei</b>     | <b>PM<sub>2.5</sub></b> | <b>PM<sub>10</sub></b> | <b>SO<sub>2</sub></b> | <b>NO<sub>2</sub></b> | <b>O<sub>3</sub></b> | <b>Temperature</b> |
|-------------------|-------------------------|------------------------|-----------------------|-----------------------|----------------------|--------------------|
| PM <sub>2.5</sub> | 1                       |                        |                       |                       |                      |                    |
| PM <sub>10</sub>  | 0.858**                 | 1                      |                       |                       |                      |                    |
| SO <sub>2</sub>   | 0.545**                 | 0.548**                | 1                     |                       |                      |                    |
| NO <sub>2</sub>   | 0.492**                 | 0.460**                | 0.461**               | 1                     |                      |                    |
| O <sub>3</sub>    | 0.367**                 | 0.356**                | 0.072**               | -0.039**              | 1                    |                    |
| Temperature       | -0.105**                | -0.163**               | 0.001                 | -0.245**              | -0.064**             | 1                  |

  

| <b>Kaohsiung</b>  | <b>PM<sub>2.5</sub></b> | <b>PM<sub>10</sub></b> | <b>SO<sub>2</sub></b> | <b>NO<sub>2</sub></b> | <b>O<sub>3</sub></b> | <b>Temperature</b> |
|-------------------|-------------------------|------------------------|-----------------------|-----------------------|----------------------|--------------------|
| PM <sub>2.5</sub> | 1                       |                        |                       |                       |                      |                    |
| PM <sub>10</sub>  | 0.855**                 | 1                      |                       |                       |                      |                    |
| SO <sub>2</sub>   | 0.443**                 | 0.525**                | 1                     |                       |                      |                    |
| NO <sub>2</sub>   | 0.768**                 | 0.767**                | 0.705**               | 1                     |                      |                    |
| O <sub>3</sub>    | 0.372**                 | 0.368**                | -0.020                | 0.052**               | 1                    |                    |
| Temperature       | -0.518**                | -0.557**               | -0.488**              | -0.748**              | 0.136**              | 1                  |

Note:\*\*p-value &lt;0.01
